# Supplementary material
Source: publisher figshare collection journal article supplement (https://tandf.figshare.com/ndownloader/files/13174982)
Supplement: Supplementary file 1 [file 13174982]

**Supplementary Material**

Chemical preparation, crystal structure and vibrational study of a new dihydrogenotriphosphate trihydrate of 4-aminobenzoic acid fertilizer type NP

A. ATIBI, K. EL KABABI, M. BELHABRA*, S. ZERRAF, M. TRIDANE and S. BELAAOUAD

Table S1. Atomic coordinates and isotropic thermal agitation factors (Å2) for (NH3C6H4COOH)3H2P3O10·3H2O.

| **Atoms** | **x/a** | **y/b** | **z/c** | **B** |
| --- | --- | --- | --- | --- |
| P1 | 0.86050(8) | 0.09403(6) | 0.56250(6) | 0.154(3) |
| P2 | 0.68775(9) | 0.22109(6) | 0.45706(6) | 0.146(3) |
| P3 | 0.52583(9) | 0.36420(6) | 0.55663(6) | 0.161(3) |
| O1 | 0.0230(2) | 0.1147(2) | 0.6128(2) | 0.163(6) |
| O2 | 0.7740(3) | 0.0819(2) | 0.6352(22) | 0.308(6) |
| O3 | 0.8008(3) | 0.0059(2) | 0.4518(2) | 0.214(6) |
| O4 | 0.8351(2) | 0.1986(2) | 0.5271(2) | 0.188(6) |
| O5 | 0.5646(2) | 0.1246(2) | 0.4209(2) | 0.195(6) |
| O6 | 0.7232(3) | 0.2644(2) | 0.3747(2) | 0.245(6) |
| O7 | 0.6708(2) | 0.3199(2) | 0.5543(2) | 0.176(6) |
| O8 | 0.4425(3) | 0.3475(2) | 0.4329(2) | 0.182(6) |
| O9 | 0.4383(3) | 0.2917(2) | 0.5955(2) | 0.276(6) |
| O10 | 0.5773(3) | 0.4839(2) | 0.6275(2) | 0.176(6) |
| N1 | 0.1842(3) | 0.3394(2) | 0.6346(2) | 0.207(12) |
| N2 | 0.4884(3) | 0.8828(2) | 0.3532(2) | 0.163(6) |
| N3 | 0.2718(3) | 0.1057(2) | 0.3118(2) | 0.201(6) |
| C1 | 0.2015(3) | 0.3655(2) | 0.7533(2) | 0.170(12) |
| C2 | 0.0857(4) | 0.3859(3) | 0.7887(3) | 0.214(12) |
| C3 | 0.3333(4) | 0.3686(3) | 0.8254(3) | 0.214(12) |
| C4 | 0.1048(4) | 0.4114(3) | 0.9010(3) | 0.239(12) |
| C5 | 0.3510(4) | 0.3935(3) | 0.9376(3) | 0.220(12) |
| C6 | 0.2368(4) | 0.4161(2) | 0.9757(3) | 0.188(12) |
| C7 | 0.2553(4) | 0.4468(3) | 0.0971(3) | 0.214(12) |
| C8 | 0.4501(3) | 0.8448(2) | 0.2316(3) | 0.157(6) |
| C9 | 0.3381(4) | 0.7526(3) | 0.1683(3) | 0.188(12) |
| C10 | 0.5236(3) | 0.9024(3) | 0.1836(3) | 0.201(12) |
| C11 | 0.2983(4) | 0.7179(3) | 0.0533(3) | 0.214(12) |
| C12 | 0.4823(4) | 0.8678(3) | 0.0680(3) | 0.201(12) |
| C13 | 0.3692(4) | 0.7752(3) | 0.0027(3) | 0.239(12) |
| C14 | 0.3183(4) | 0.7384(3) | 0.8788(3) | 0.239(12) |
| C15 | 0.2367(3) | 0.0903(3) | 0.1934(3) | 0.188(12) |
| C16 | 0.1981(4) | 0.9858(3) | 0.1157(3) | 0.214(12) |
| C17 | 0.2445(5) | 0.1802(3) | 0.1616(3) | 0.270(12) |
| C18 | 0.1661(4) | 0.9725(3) | 0.0040(3) | 0.226(12) |
| C19 | 0.2104(5) | 0.1663(3) | 0.0495(3) | 0.283(12) |
| C20 | 0.1705(3) | 0.0624(3) | 0.9708(3) | 0.195(12) |
| C21 | 0.1279(4) | 0.062(3) | 0.8494(3) | 0.207(12) |
| O11 | 0.1603(3) | 0.4675(3) | 0.1339(2) | 0.408(12) |
| O12 | 0.3855(3) | 0.4481(2) | 0.1592(2) | 0.258(6) |
| O13 | 0.2227(4) | 0.6576(3) | 0.8206(2) | 0.352(12) |
| O14 | 0.3859(3) | 0.8023(2) | 0.8395(2) | 0.327(12) |
| O15 | 0.1047(3) | 0.9591(2) | 0.7777(2) | 0.327(12) |
| O16 | 0.1188(3) | 0.1377(2) | 0.8295(2) | 0.295(12) |
| OW1 | 0.9006(3) | 0.2344(2) | 0.3904(2) | 0.314(12) |
| OW2 | 0.1751(4) | 0.5058(2) | 0.5575(3) | 0.408(12) |
| OW3 | 0.0774(3) | 0.4180(3) | 0.3177(2) | 0.415(12) |
| HO3 | 0.134(6) | 0.043(5) | 0.569(5) | 0.75(12) |
| HO8 | 0.454(5) | 0.406(4) | 0.414(4) | 0.25(10) |
| H1N1 | 0.275(5) | 0.321(4) | 0.618(4) | 0.48(9) |
| H2N1 | 0.109(5) | 0.285(4) | 0.590(4) | 0.46(9) |
| H3N1 | 0.168(5) | 0.398(4) | 0.611(4) | 0.56(10) |
| H1N2 | 0.405(4) | 0.893(3) | 0.372(3) | 0.34(7) |
| H2N2 | 0.480(4) | 0.179(3) | 0.618(3) | 0.36(7) |
| H3N2 | 0.444(5) | 0.056(4) | 0.613(3) | 0.40(8) |
| H1N3 | 0.238(4) | 0.042(3) | 0.327(3) | 0.35(7) |
| H2N3 | 0.221(4) | 0.150(3) | 0.340(3) | 0.33(8) |
| H3N3 | 0.391(5) | 0.127(4) | 0.349(4) | 0.52(9) |
| HC2 | 0.010(4) | 0.619(3) | 0.264(3) | 0.40(8) |
| HC3 | 0.414(4) | 0.352(3) | 0.801(3) | 0.30(6) |
| HC4 | 0.027(4) | 0.428(3) | 0.927(3) | 0.29(6) |
| HC5 | 0.557(4) | 0.607(3) | 0.012(3) | 0.30(6) |
| HC9 | 0.286(3) | 0.709(3) | 0.207(3) | 0.20(6) |
| HC10 | 0.398(4) | 0.038(3) | 0.772(3) | 0.31(7) |
| HC11 | 0.228(5) | 0.659(4) | 0.012(3) | 0.41(8) |
| HC12 | 0.459(4) | 0.094(3) | 0.966(3) | 0.41(8) |
| HC16 | 0.193(4) | 0.922(3) | 0.139(3) | 0.26(6) |
| HC17 | 0.257(5) | 0.252(4) | 0.215(4) | 0.60(11) |
| HC18 | 0.134(4) | 0.896(3) | 0.947(3) | 0.33(7) |
| HC19 | 0.201(5) | 0.231(4) | 0.027(4) | 0.58(10) |
| HO12 | 0.391(6) | 0.473(5) | 0.228(5) | 0.77(14) |
| HO14 | 0.332(7) | 0.787(5) | 0.758(6) | 0.94(16) |
| HO16 | 0.094(5) | 0.130(4) | 0.762(4) | 0.60(11) |
| H1w1 | 0.017(6) | 0.204(5) | 0.359(5) | 0.61(13) |
| H2w1 | 0.092(7) | 0.287(6) | 0.362(5) | 0.86(16) |
| H1w2 | 0.207(9) | 0.571(7) | 0.589(7) | 1.16(22) |
| H2w2 | 0.129(9) | 0.496(7) | 0.499(7) | 1.21(25) |
| H1w3 | 0.013(9) | 0.595(6) | 0.717(6) | 0.91(19) |
| H2w3 | 0.859(10) | 0.579(7) | 0.721(8) | 1.24(25) |

Table S2. Lengths (Å) and angles (°) in (NH3C6H4COOH)3H2P3O10·3H2O.

- Aminobenzoic acid

| N1-C1 | 1.471(4) | N1-C1-C2 | 119.4(6) |  |  |
| --- | --- | --- | --- | --- | --- |
| C1-C2 | 1.378(5) | N1-C1-C3 | 118.5(5) |  |  |
| C1-C3 | 1.371(5) | C1-C2-C4 | 118.5(6) |  |  |
| C2-C4 | 1.385(5) | C2-C4-C6 | 120.7(7) |  |  |
| C3-C5 | 1.387(5) | C4-C6-C5 | 119.7(7) | <Cϕ-Cϕ> | 1.382 |
| C4-C6 | 1.382(6) | C6-C5-C3 | 120.0(7) |  |  |
| C5-C6 | 1.388(6) | C5-C3-C1 | 119.0(6) |  |  |
| C6-C7 | 1.498(5) | C3-C1-C2 | 122.1(7) |  |  |
| C7-O11 | 1.197(5) | C6-C7-O11 | 123.2(7) |  |  |
| C7-O12 | 1.314(5) | C6-C7-O12 | 113.5(6) |  |  |
|  |  | O11-C7-O12 | 123.2(7) |  |  |
|  |  |  |  |  |  |
| N2-C8 | 1.466(3) | N2-C8-C9 | 118.4(5) |  |  |
| C8-C9 | 1.380(5) | N2-C8-C10 | 119.7(5) |  |  |
| C8-C10 | 1.375(5) | C8-C9-C11 | 118.9(6) |  |  |
| C9-C11 | 1.384(5) | C9-C11-C13 | 120.5(7) |  |  |
| C10-C12 | 1.391(5) | C11-C13-12 | 119.8(7) | <Cϕ-Cϕ> | 1.385 |
| C11-C13 | 1.385(6) | C13-C12-C10 | 119.9(7) |  |  |
| C12-C13 | 1.392(6) | C12-C10-C8 | 119.1(6) |  |  |
| C13-C14 | 1.488(5) | C10-C8-C8 | 121.8(7) |  |  |
| C14-O13 | 1.202(5) | C13-C14-O13 | 122.6(7) |  |  |
| C14-O14 | 1.309(5) | C13-C14-O14 | 114.1(6) |  |  |
|  |  | O13-C14-O14 | 123.4(8) |  |  |
|  |  |  |  |  |  |
| N3-C15 | 1.463(4) | N3-C15-C16 | 119.9(6) |  |  |
| C15-C16 | 1.376(6) | N3-C15-C17 | 119.3(6) |  |  |
| C15-C17 | 1.362(6) | C15-C16-C18 | 119.3(7) |  |  |
| C16-C18 | 1.384(5) | C16-C18-C20 | 120.5(7) |  |  |
| C17-C19 | 1.386(5) | C18-C20-C19 | 119.6(7) | <Cϕ-Cϕ> | 1.376 |
| C18-C20 | 1.373(6) | C20-C19-C17 | 120.2(7) |  |  |
| C19-C20 | 1.374(6) | C19-C17-C15 | 119.7(7) |  |  |
| C20-C21 | 1.495(5) | C17-C15-C16 | 120.8(8) |  |  |
| C21-O15 | 1.196(5) | C20-C21-O15 | 123.8(7) |  |  |
| C21-O16 | 1.310(5) | C20-C21-O16 | 112.9(6) |  |  |
|  |  | O15-C21-O16 | 123.3(7) |  |  |
|  |  |  |  |  |  |
| <N-C> | 1.467 | <Cϕ-Cϕ> | 1.381 | <C-COO> | 1.494 |
| <C-O> | 1.198 | <C-OH> | 1.311 |  |  |
